# Supplementary material for: Infrared spectra of carbocations and CH4+ in helium
Source: Royal Society of Chemistry journal article supplement (doi:10.1039/d1cp03138d), 2021-01-01
Supplement: d1cp03138d1.pdf [file d1cp03138d1.pdf]

Electronic Supplementary Information for

## **Infrared spectra of carbocations and $\text{CH}_4^+$ in helium**

Julia A. Davies, Shengfu Yang, and Andrew M. Ellis\*

Department of Chemistry, University of Leicester, University Road, Leicester, LE1 7RH, UK

\*Corresponding author: Email: [andrew.ellis@le.ac.uk](mailto:andrew.ellis@le.ac.uk)

**Table S1.** Cartesian coordinates for the global minimum structure of CH<sub>3</sub><sup>+</sup>, along with the vibrational mode frequencies ( $\nu$  in cm<sup>-1</sup>) and IR intensities ( $I$  in km.mol<sup>-1</sup>) determined from harmonic and anharmonic (GVPT2) calculations at the MP2/aug-cc-pVTZ level of theory.

| CH <sub>3</sub> <sup>+</sup> | X (Å)  | Y (Å)  | Z (Å)  | Harmonic |      | Anharmonic |      |
|------------------------------|--------|--------|--------|----------|------|------------|------|
|                              |        |        |        | $\nu$    | $I$  | $\nu$      | $I$  |
| C                            | -0.096 | 0.000  | -0.137 | 3292.3   | 73.0 | 3158.8     | 76.2 |
| H                            | -0.607 | 0.941  | 0.047  | 3292.3   | 73.0 | 3158.8     | 76.2 |
| H                            | -0.607 | -0.941 | 0.047  | 3087.2   | 0.0  | 2988.3     | 0.0  |
| H                            | 0.927  | 0.000  | -0.503 | 1449.6   | 16.6 | 1413.4     | 18.3 |
|                              |        |        |        | 1449.6   | 16.6 | 1413.4     | 18.3 |
|                              |        |        |        | 1441.9   | 7.2  | 1427.3     | 10.3 |

**Table S2.** Cartesian coordinates for the global minimum structure of CH<sub>5</sub><sup>+</sup>, in which the axis of the H<sub>2</sub> moiety eclipses a C-H bond in the CH<sub>3</sub> tripod. Also shown are vibrational mode frequencies ( $\nu$  in cm<sup>-1</sup>) and IR intensities ( $I$  in km.mol<sup>-1</sup>) obtained from harmonic and anharmonic (GVPT2) calculations at the MP2/aug-cc-pVTZ level of theory.

| CH <sub>5</sub> <sup>+</sup> | X (Å)  | Y (Å)  | Z (Å)  | Harmonic |       | Anharmonic |      |
|------------------------------|--------|--------|--------|----------|-------|------------|------|
|                              |        |        |        | $\nu$    | $I$   | $\nu$      | $I$  |
| C                            | -0.151 | -0.023 | 0.027  | 3266.2   | 77.4  | 3142.2     | 53.6 |
| H                            | -0.665 | 0.920  | -0.129 | 3165.2   | 72.3  | 3004.1     | 69.8 |
| H                            | -0.654 | -0.955 | -0.209 | 3029.2   | 108.8 | 2880.9     | 93.1 |
| H                            | 0.666  | -0.054 | 0.881  | 2714.9   | 34.7  | 2745.9     | 32.8 |
| H                            | 0.812  | 0.006  | -0.519 | 2515.9   | 64.4  | 2414.5     | 51.9 |
| H                            | -0.253 | -0.073 | 1.203  | 1582.9   | 14.1  | 1369.2     | 2.6  |
|                              |        |        |        | 1501.8   | 0.2   | 1451.4     | 0.3  |
|                              |        |        |        | 1472.4   | 0.2   | 1432.8     | 3.4  |
|                              |        |        |        | 1301.7   | 52.2  | 1210.4     | 49.3 |
|                              |        |        |        | 1288.5   | 35.6  | 1124.6     | 84.7 |
|                              |        |        |        | 750.8    | 200.4 | 556.0      | 85.1 |
|                              |        |        |        | 254.9    | 45.0  | 64.8       | 18.5 |

**Table S3.** Cartesian coordinates for the global minimum structure of CH<sub>5</sub><sup>+</sup>( CH<sub>4</sub>), along with the vibrational mode frequencies ( $\nu$  in cm<sup>-1</sup>) and IR intensities ( $I$  in km.mol<sup>-1</sup>) determined from harmonic calculations at the MP2/aug-cc-pVTZ level of theory.

| C <sub>2</sub> H <sub>9</sub> <sup>+</sup> | X (Å)  | Y (Å)  | Z (Å)  | $\nu$  | $I$   |
|--------------------------------------------|--------|--------|--------|--------|-------|
| C                                          | 0.096  | -0.101 | -0.035 | 3267.5 | 55.9  |
| H                                          | -0.474 | 0.424  | -0.794 | 3199.2 | 2.5   |
| H                                          | -0.410 | -0.423 | 0.869  | 3168.6 | 70.4  |
| H                                          | 1.294  | 0.084  | 0.014  | 3167.4 | 4.2   |
| H                                          | 0.565  | -0.986 | -0.503 | 3138.4 | 2.0   |
| H                                          | 0.707  | 0.791  | 0.396  | 3047.1 | 85.6  |
| C                                          | 3.296  | 0.337  | 0.065  | 3018.4 | 48.1  |
| H                                          | 2.940  | -0.496 | 0.679  | 2721.2 | 51.2  |
| H                                          | 4.368  | 0.196  | -0.048 | 2194.5 | 721.6 |
| H                                          | 3.123  | 1.291  | 0.558  | 1601.7 | 77.7  |
| H                                          | 2.878  | 0.331  | -0.945 | 1588.1 | 1.4   |
|                                            |        |        |        | 1580.1 | 8.1   |
|                                            |        |        |        | 1507.0 | 0.0   |
|                                            |        |        |        | 1474.0 | 18.9  |
|                                            |        |        |        | 1384.6 | 8.0   |
|                                            |        |        |        | 1358.6 | 13.2  |
|                                            |        |        |        | 1327.3 | 28.9  |
|                                            |        |        |        | 1298.5 | 54.6  |
|                                            |        |        |        | 1291.9 | 42.4  |
|                                            |        |        |        | 725.2  | 155.2 |
|                                            |        |        |        | 464.4  | 22.1  |
|                                            |        |        |        | 287.6  | 44.7  |
|                                            |        |        |        | 236.0  | 1.0   |
|                                            |        |        |        | 213.2  | 68.3  |
|                                            |        |        |        | 168.1  | 0.3   |
|                                            |        |        |        | 141.2  | 34.6  |
|                                            |        |        |        | 98.3   | 1.1   |

**Table S4.** Cartesian coordinates for the global minimum structure of  $C_2H_5^+$ , also known as the non-classical structure, along with the vibrational mode frequencies ( $\nu$  in  $cm^{-1}$ ) and IR intensities ( $I$  in  $km.mol^{-1}$ ) determined from harmonic and anharmonic (GVPT2) calculations at the MP2/aug-cc-pVTZ level of theory.

| $C_2H_5^+$ | X (Å)  | Y (Å)  | Z (Å)  | Harmonic |       | Anharmonic |       |
|------------|--------|--------|--------|----------|-------|------------|-------|
|            |        |        |        | $\nu$    | $I$   | $\nu$      | $I$   |
| C          | -0.035 | -0.016 | -0.780 | 3296.4   | 67.8  | 3150.9     | 59.3  |
| C          | -0.033 | -0.016 | 0.600  | 3279.4   | 0.0   | 3133.9     | 0.0   |
| H          | -0.036 | 0.918  | -1.328 | 3171.2   | 0.4   | 3017.1     | 0.5   |
| H          | -0.037 | -0.951 | -1.328 | 3168.2   | 34.3  | 3069.2     | 23.0  |
| H          | -0.033 | 0.918  | 1.149  | 2215.6   | 52.0  | 2257.3     | 47.6  |
| H          | -0.034 | -0.951 | 1.149  | 1585.5   | 7.7   | 1545.7     | 0.0   |
| H          | 1.077  | -0.017 | -0.091 | 1488.7   | 20.8  | 1453.3     | 22.0  |
|            |        |        |        | 1369.8   | 7.0   | 1329.3     | 5.5   |
|            |        |        |        | 1293.1   | 9.6   | 1225.8     | 0.0   |
|            |        |        |        | 1261.5   | 0.0   | 1239.0     | 0.0   |
|            |        |        |        | 1148.1   | 40.5  | 1112.1     | 43.8  |
|            |        |        |        | 1102.6   | 20.8  | 1041.1     | 23.3  |
|            |        |        |        | 1099.1   | 0.0   | 1072.7     | 0.0   |
|            |        |        |        | 836.7    | 0.0   | 834.1      | 0.0   |
|            |        |        |        | 789.3    | 127.7 | 696.6      | 114.6 |

**Table S5.** Cartesian coordinates for the transition state structure of  $C_2H_5^+$ , alternatively known as the classical structure, along with the vibrational mode frequencies ( $\nu$  in  $cm^{-1}$ ) and IR intensities ( $I$  in  $km.mol^{-1}$ ) determined from harmonic calculations at the MP2/aug-cc-pVTZ level of theory. The “-“ symbol before the lowest frequency value indicates that the optimized geometry is a 1st order saddle point.

| TS | X (Å)  | Y (Å)  | Z (Å)  | $\nu$  | $I$   |
|----|--------|--------|--------|--------|-------|
| C  | 0.662  | -0.039 | 0.000  | 3272.1 | 44.6  |
| C  | -0.745 | -0.008 | 0.000  | 3253.7 | 3.4   |
| H  | 0.988  | 0.625  | -0.830 | 3155.1 | 3.9   |
| H  | 1.144  | -1.006 | 0.000  | 2931.6 | 77.0  |
| H  | -1.267 | 0.945  | 0.000  | 2925.9 | 186.2 |
| H  | -1.358 | -0.906 | 0.000  | 1577.3 | 4.4   |
| H  | 0.988  | 0.625  | 0.830  | 1470.9 | 17.1  |
|    |        |        |        | 1409.5 | 26.8  |
|    |        |        |        | 1281.7 | 47.5  |
|    |        |        |        | 1280.4 | 0.8   |
|    |        |        |        | 1191.9 | 10.4  |
|    |        |        |        | 1066.6 | 205.1 |
|    |        |        |        | 799.8  | 27.2  |
|    |        |        |        | 771.8  | 2.2   |
|    |        |        |        | -398.6 | 44.6  |

**Table S6.** Cartesian coordinates for the global minimum structure of CH<sub>4</sub><sup>+</sup>, along with the vibrational mode frequencies ( $\nu$  in cm<sup>-1</sup>) and IR intensities ( $I$  in km.mol<sup>-1</sup>) determined from harmonic and anharmonic (GVPT2) calculations at the MP2/aug-cc-pVTZ level of theory.

| CH <sub>4</sub> <sup>+</sup> | X (Å)  | Y (Å)  | Z (Å)  | Harmonic |       | Anharmonic |       |
|------------------------------|--------|--------|--------|----------|-------|------------|-------|
|                              |        |        |        | $\nu$    | $I$   | $\nu$      | $I$   |
| C                            | 0.182  | 0.002  | 0.965  | 3355.4   | 90.4  | 3198.7     | 101.3 |
| H                            | 0.042  | 0.144  | -0.096 | 3209.0   | 53.7  | 3089.1     | 53.2  |
| H                            | 1.132  | -0.131 | 1.460  | 2610.0   | 41.5  | 2475.5     | 22.7  |
| H                            | -0.719 | -0.548 | 1.498  | 2334.3   | 135.9 | 2211.5     | 135.9 |
| H                            | -0.637 | 0.533  | 1.632  | 1618.7   | 4.6   | 1504.7     | 1.6   |
|                              |        |        |        | 1325.1   | 43.6  | 1279.7     | 33.1  |
|                              |        |        |        | 1237.2   | 33.2  | 1150.0     | 31.4  |
|                              |        |        |        | 906.3    | 91.5  | 850.0      | 107.0 |
|                              |        |        |        | 485.9    | 0.0   | 397.7      | 0.0   |
